# Supplementary material for: Fourier-transform infrared spectroscopy coupled with a classification machine for the analysis of blood plasma or serum: a novel diagnostic approach for ovarian cancer
Source: Royal Society of Chemistry journal article supplement (doi:10.1039/c3an36654e), 2013-01-01
Supplement: c3an36654e.pdf [file c3an36654e.pdf]

### Fourier-transform infrared spectroscopy coupled with a classification machine for the analysis of blood plasma or serum: a novel diagnostic approach for ovarian cancer

Ketan Gajjar<sup>1,2</sup>, Júlio Trevisan<sup>1,3</sup>, Gemma Owens<sup>2</sup>, Patrick J. Keating<sup>2</sup>, Nicholas J. Wood<sup>2</sup>, Helen Stringfellow<sup>2</sup>, Pierre L. Martin-Hirsch<sup>2</sup>, Francis L. Martin<sup>1</sup>

<sup>1</sup>Centre for Biophotonics, Lancaster Environment Centre, Lancaster University, Lancaster, UK;

<sup>2</sup>Department of Obstetrics and Gynaecology, Central Lancashire Teaching Hospitals NHS

Foundation Trust, Preston, UK; <sup>3</sup>School of Computing and Communications, Lancaster University, Lancaster, UK

### List of Figures

|                                                                                                            |   |
|------------------------------------------------------------------------------------------------------------|---|
| <b>Figure S1</b> - Flow diagram of sample collection, storage and preparation for spectroscopic analysis.. | 2 |
| <b>Figure S2</b> - Homogeneous nature of samples.....                                                      | 3 |
| <b>Figure S3</b> - Pre-processed spectra for all datasets.....                                             | 4 |
| <b>Figure S4</b> - Classification machine in training mode.....                                            | 5 |
| <b>Figure S5</b> - Machine in classification mode.....                                                     | 6 |
| <b>Figure S6</b> - Absence of artifacts in raw ATR-FTIR spectra.....                                       | 7 |
| <b>Figure S7</b> - Top six discriminating wavenumbers for cancer <i>versus</i> control.....                | 8 |

### List of Tables

|                                                                                                           |    |
|-----------------------------------------------------------------------------------------------------------|----|
| <b>Table S1</b> - Patients characteristics in the control group.....                                      | 9  |
| <b>Table S2</b> - Patients characteristics in the ovarian cancer group.....                               | 10 |
| <b>Table S3</b> - Patients characteristics in the endometrial cancer group.....                           | 11 |
| <b>Table S4</b> - Spectral acquisition settings.....                                                      | 12 |
| <b>Table S5</b> - Classification results: ovarian plasma data - all system set-ups.....                   | 13 |
| <b>Table S6</b> - Classification results: ovarian plasma data - 10 best system set-ups from Table S5..... | 13 |
| <b>Table S7</b> - Classification results: ovarian plasma data - ensemble systems.....                     | 14 |
| <b>Table S8</b> - Classification results: ovarian serum data - all system set-ups.....                    | 15 |
| <b>Table S9</b> - Classification results: ovarian serum data - 10 best system set-ups from Table S8.....  | 15 |
| <b>Table S10</b> - Classification results: ovarian serum data - ensemble systems.....                     | 16 |
| <b>Table S11</b> - Classification results: endometrial plasma data - all system set-ups.....              | 17 |
| <b>Table S12</b> - Classification results: endometrial plasma data - 10 best set-ups from Table S11.....  | 17 |
| <b>Table S13</b> - Classification results: endometrial plasma data - ensemble systems.....                | 18 |
| <b>Table S14</b> - Classification results: endometrial serum data - all system set-ups.....               | 19 |
| <b>Table S15</b> - Classification results: endometrial serum data - 10 best set-ups from Table S14.....   | 19 |
| <b>Table S16</b> - Classification results: endometrial serum data - ensemble systems.....                 | 20 |

## Electronic Supplementary Information

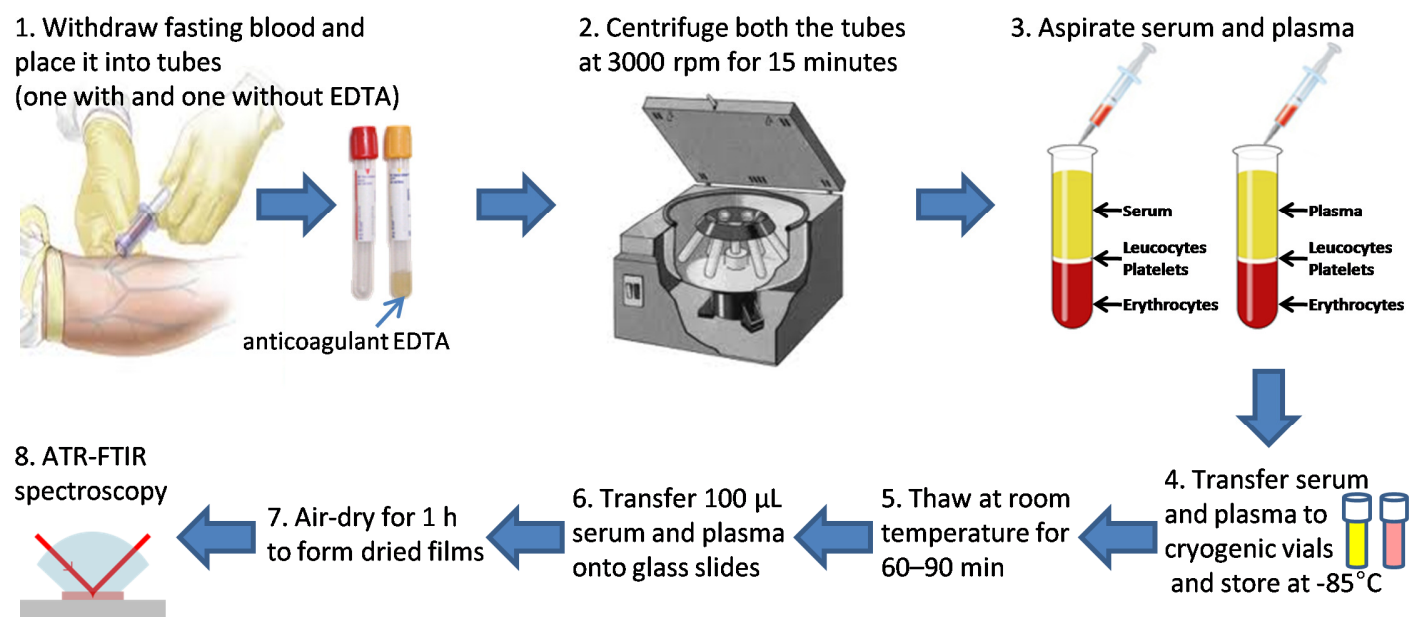

Figure S1 - Flow diagram of sample collection, storage and preparation for spectroscopic analysis.

**Visualization of plasma  
sample through ATR crystal**

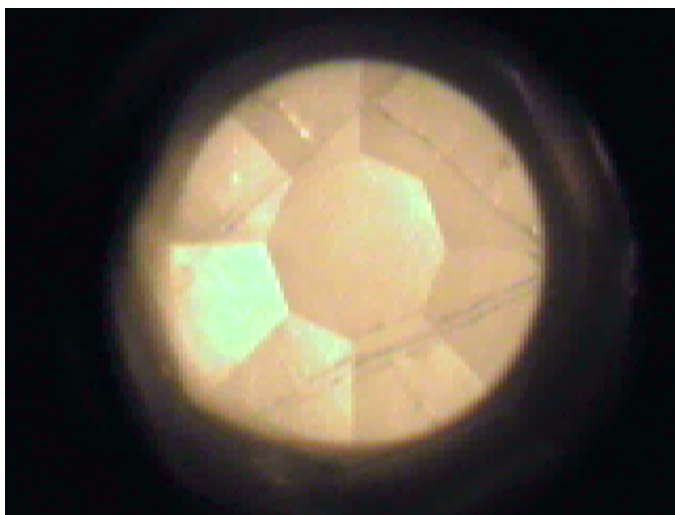

**Sample in direct contact  
with ATR crystal**

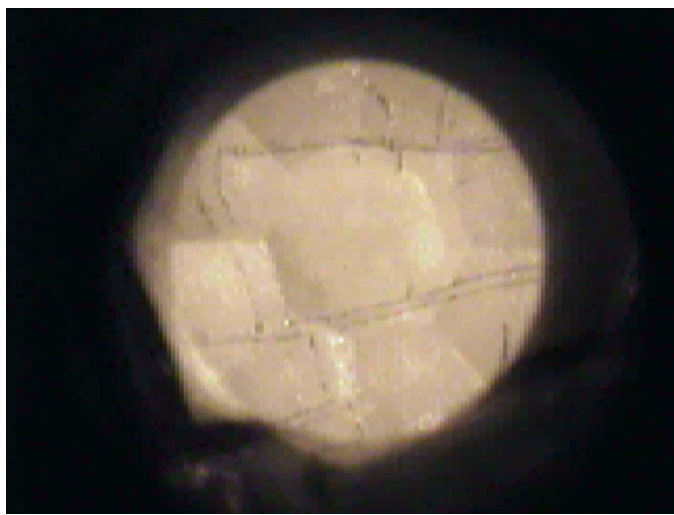

**Figure S2 - Homogeneous nature of samples.**

A sample of blood plasma on a Low-E glass slide viewed through or in direct contact with an ATR crystal. The homogeneity of the sample is clearly evident in the images taken through the ATR crystal. All the analyzed samples had a similar homogeneous appearance.

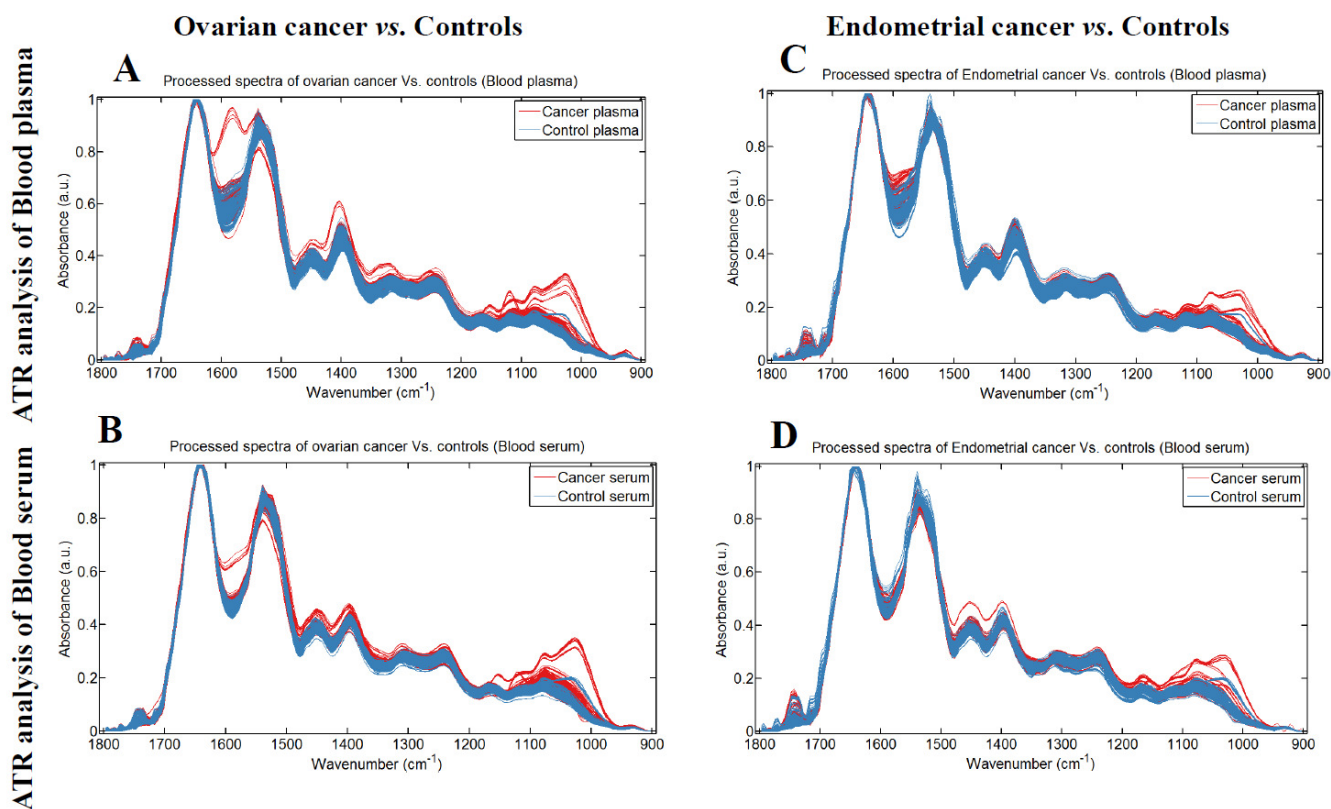

**Figure S3 - Spectra for all datasets, pre-processed for visualization.**

Spectra were cut to the bio-fingerprint region ( $1800\text{ cm}^{-1}$  -  $900\text{ cm}^{-1}$ ), followed by rubberband baseline correction and normalization to the Amide I peak ( $1650\text{ cm}^{-1}$ ). (A) shows the pre-processed infrared (IR) spectra obtained from blood plasma of ovarian cancer vs. controls; and, (B) shows the IR spectra obtained from blood serum of ovarian cancer vs. controls. Similarly (C) shows the IR spectra from blood plasma after pre-processing for endometrial cancer vs. controls; and, (D) shows the IR spectra of blood serum of endometrial cancer vs. controls.

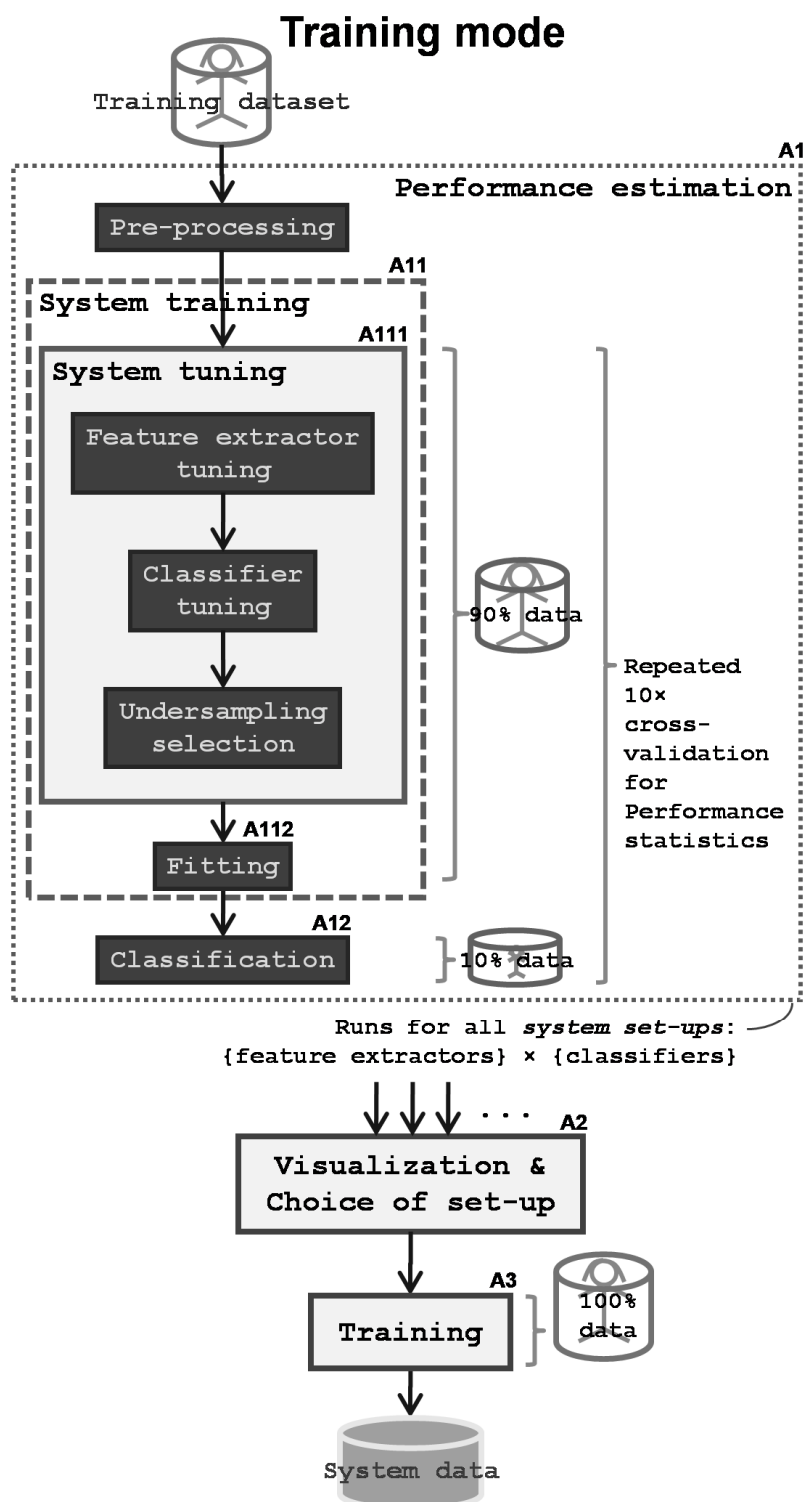

**Figure S4 - Classification machine in training mode.**

Patient data is first pre-processed prior to being used for training. System training consists of tuning followed by fitting. After the system is tuned, the data is used again to fit the system, which is assessed through classification performed using a spared 10% of data. This process is repeated 10 times in a cross-validated fashion to obtain 10 performances estimations that are used to calculate statistics. These statistics are used to compare system set-ups. Once chosen, the final system undergoes the training process depicted in A11, however using 100% of available data this time. The final system data represents all data-dependent model parameters, structures, and matrices etc, which were determined during the training process.

## Classification mode

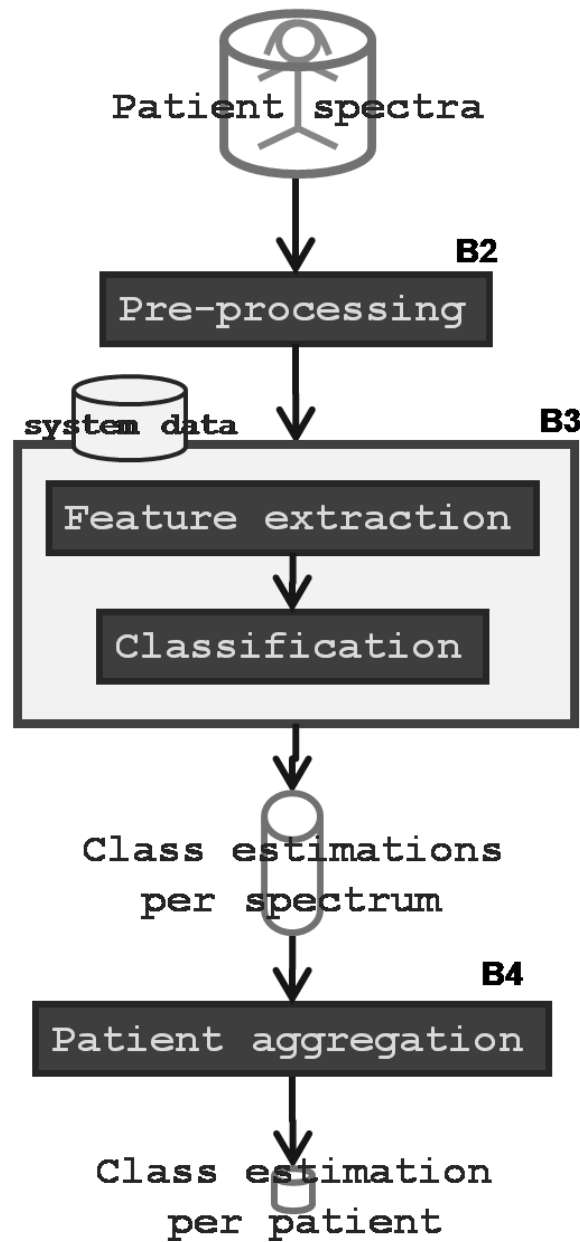

**Figure S5 - Machine in classification mode.**

Feature extraction and classification are performed using system knowledge gained during training mode (system data). Class estimations per spectrum are used in a pooled decision (*e.g.*, major voting) to generate a final estimation per patient.

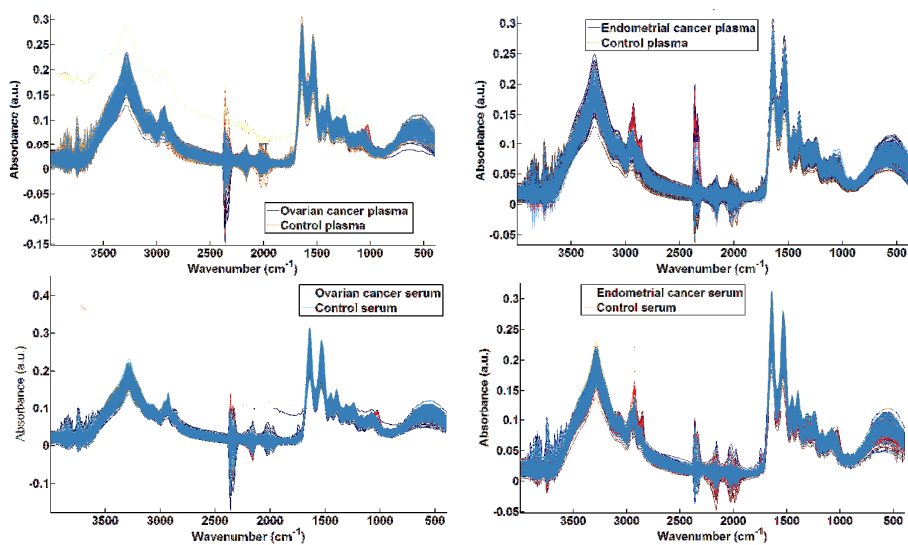

**Figure S6 - Absence of artefacts in raw ATR-FTIR spectra.**

Examples of raw ATR-FTIR spectra derived from ovarian cancer (plasma or serum) samples. There is an absence of any apparent artefacts, such as Mie scattering, in raw spectra acquired through the  $\approx 250 \mu\text{m} \times 250 \mu\text{m}$  ATR crystal.

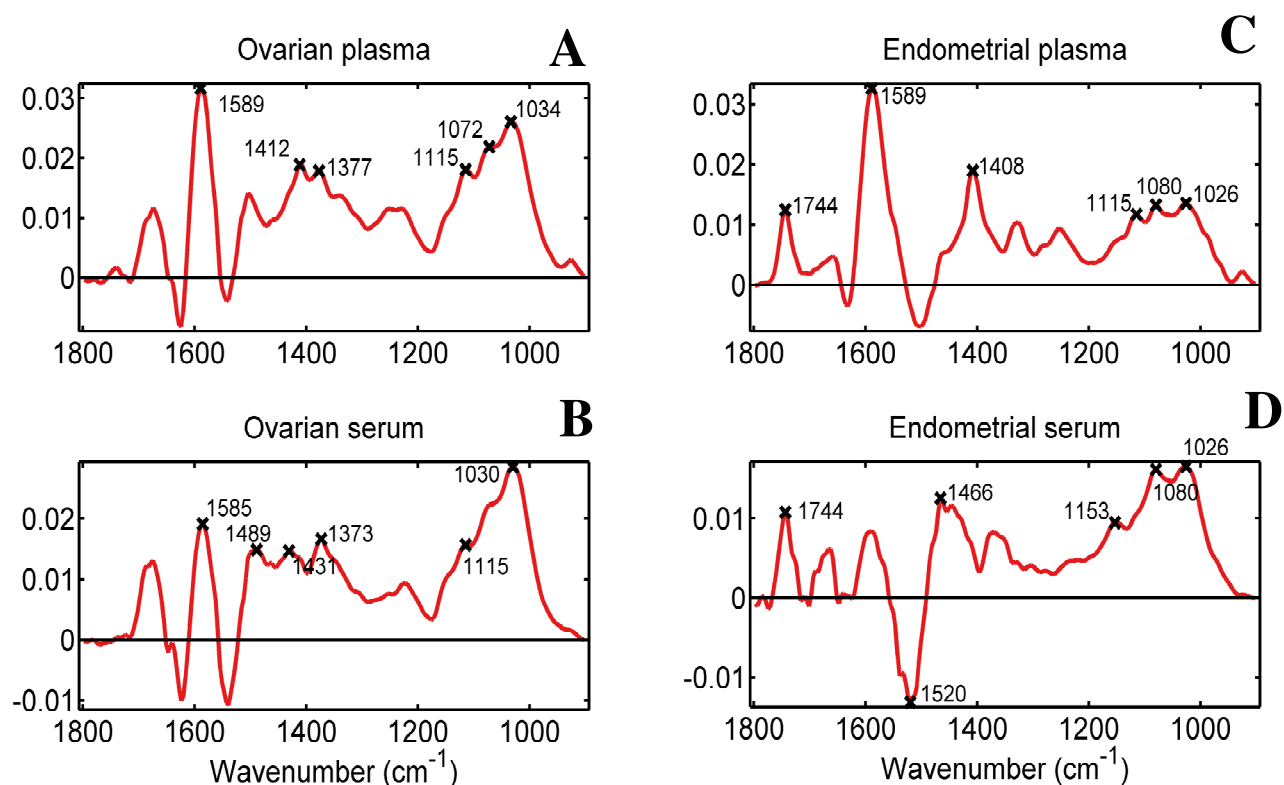

**Figure S7 - Top six discriminating wavenumbers for cancer versus control.**

The curves represent differences in absorbance (Cancer minus Control). For ovarian cancer plasma vs. control plasma (Fig. 4A), the discriminating wavenumbers (biomolecular assignments) are 1034 cm<sup>-1</sup> (collagen), 1072 cm<sup>-1</sup> (nucleic acid band), 1115 cm<sup>-1</sup> (RNA), 1377 cm<sup>-1</sup> (oligonucleotide base and sugar), 1412 cm<sup>-1</sup> (stretching C-N, deformation N-H, deformation C-H) and 1589 cm<sup>-1</sup> (ring C-C stretch of phenyl). In case of ovarian cancer serum vs. control serum (Fig. 4B), the discriminating wavenumbers (biomolecular assignments) are 1030 cm<sup>-1</sup> (stretching C-O ribose), 1115 cm<sup>-1</sup> (RNA), 1373 cm<sup>-1</sup> (stretching C-N cytosine, guanine), 1431 cm<sup>-1</sup> (proteins), 1489 cm<sup>-1</sup> (in-plane CH bending vibration) and 1585 cm<sup>-1</sup> (Amide I). The top six discriminating wavenumbers for endometrial cancer plasma vs. control plasma (Fig. 4C) are 1026 cm<sup>-1</sup> (glycogen), 1080 cm<sup>-1</sup> ( $\nu_s\text{PO}_2^-$ ), (RNA), 1408 cm<sup>-1</sup> ( $\text{COO}^-$  symmetric stretching vibrations of fatty acids and amino acid), 1589 cm<sup>-1</sup> (ring C-C stretch of phenyl) and 1744 cm<sup>-1</sup> (lipids). For endometrial cancer serum vs. control serum (Fig. 4D), the discriminating wavenumbers with their biomolecular assignments are 1026 cm<sup>-1</sup> (glycogen), 1080 cm<sup>-1</sup> ( $\nu_s\text{PO}_2^-$ ), 1153 cm<sup>-1</sup>, 1466 cm<sup>-1</sup>, 1520 cm<sup>-1</sup> and 1744 cm<sup>-1</sup> (lipids).



**Table S1 - Patients characteristics in the control group.**

| <b>GUTB code</b> | <b>Age (years)</b> | <b>Menopausal status</b> | <b>Histology</b>            | <b>Endometrial thickness</b> |
|------------------|--------------------|--------------------------|-----------------------------|------------------------------|
| E1               | 46                 | Premenopausal            | Uterine adenomyosis         | 5 mm                         |
| E3               | 44                 | Premenopausal            | Leiomyoma                   | 7 mm                         |
| E4               | 35                 | Premenopausal            | Normal histology            | 12 mm                        |
| E5               | 47                 | Premenopausal            | Normal histology            | 6 mm                         |
| E6               | 31                 | Premenopausal            | Endometriosis               | 3 mm                         |
| E7               | 49                 | Premenopausal            | Leiomyoma                   | 8 mm                         |
| E8               | 42                 | Premenopausal            | Normal histology            | Not available                |
| E9               | 47                 | Premenopausal            | Endometriosis               | Not available                |
| E10              | 71                 | Postmenopausal           | Normal histology (Prolapse) | Not available                |
| E11              | 43                 | Premenopausal            | Normal histology            | 6 mm                         |
| E12              | 47                 | Premenopausal            | Uterine adenomyosis         | 4 mm                         |
| E13              | 44                 | Premenopausal            | Normal histology            | 8 mm                         |
| E14              | 46                 | Premenopausal            | Normal histology            | 2 mm                         |
| E15              | 77                 | Postmenopausal           | Normal histology (Prolapse) | Atrophic                     |
| E16              | 43                 | Premenopausal            | Normal histology            | 6 mm                         |
| E19              | 67                 | Postmenopausal           | Normal histology (Prolapse) | Atrophic                     |
| E20              | 38                 | Premenopausal            | Normal histology            | 6 mm                         |
| E21              | 50                 | Premenopausal            | Endometriosis               | 3 mm                         |
| E23              | 46                 | Premenopausal            | Normal histology            | 5.9 mm                       |
| E24              | 35                 | Premenopausal            | Normal histology            | Not available                |
| E25              | 39                 | Premenopausal            | Uterine adenomyosis         | 6 mm                         |
| E26              | 42                 | Premenopausal            | Normal histology            | 14 mm                        |
| E27              | 42                 | Premenopausal            | Leiomyoma                   | 12 mm                        |
| E28              | 39                 | Premenopausal            | Normal histology            | Not available                |
| E30              | 76                 | Postmenopausal           | Normal histology (prolapse) | Atrophic                     |
| E31              | 47                 | Premenopausal            | Normal histology            | Not available                |
| E32              | 38                 | Premenopausal            | Leiomyoma                   | Very thin                    |
| E33              | 47                 | Premenopausal            | Leiomyoma                   | 10 mm                        |
| E35              | 32                 | Premenopausal            | Normal histology            | 6 mm                         |
| E36              | 44                 | Premenopausal            | Normal histology            | Not available                |
| <b>Average</b>   | <b>46.47</b>       |                          |                             |                              |

Table S2 - Patients characteristics in the ovarian cancer group.

| GUTB code      | Age (years)  | Menopausal status | Serum CA125 | Histology                          | FIGO stage |
|----------------|--------------|-------------------|-------------|------------------------------------|------------|
| OC1            | 77           | Postmenopausal    | <35         | Serous/endometrioid adenocarcinoma | 3B         |
| OC2            | 60           | Postmenopausal    | >35         | Metastatic adenocarcinoma          | 4          |
| OC4            | 69           | Postmenopausal    | >35         | Serous/mucinous carcinoma          | 1A         |
| OC5            | 60           | Postmenopausal    | >35         | Mucinous carcinoma                 | 1A         |
| OC6            | 40           | Premenopausal     | >35         | Serous adenocarcinoma              | 3A         |
| OC7            | 86           | Postmenopausal    | >35         | Clear cell carcinoma               | 2A         |
| OC8            | 74           | Postmenopausal    | >35         | Serous adenocarcinoma              | 1C         |
| OC9            | 74           | Postmenopausal    | >35         | Serous adenocarcinoma              | 3C         |
| OC10           | 65           | Postmenopausal    | >35         | Serous adenocarcinoma              | 1C         |
| OC11           | 64           | Postmenopausal    | >35         | Serous adenocarcinoma              | 1C         |
| OC12           | 65           | Postmenopausal    | >35         | Mucinous carcinoma                 | 1A         |
| OC13           | 62           | Postmenopausal    | >35         | Serous adenocarcinoma              | 1A         |
| OC14           | 81           | Postmenopausal    | >35         | Mucinous carcinoma                 | 1A         |
| OC15           | 60           | Postmenopausal    | >35         | Clear cell carcinoma               | 1C         |
| OC16           | 65           | Postmenopausal    | >35         | Serous adenocarcinoma              | 1C         |
| OC17           | 56           | Postmenopausal    | >35         | Serous adenocarcinoma              | 3C         |
| OC19           | 62           | Postmenopausal    | >35         | Endometrioid adenocarcinoma        | 1C         |
| OC21           | 64           | Postmenopausal    | <35         | Serous adenocarcinoma              | 3B         |
| OC22           | 78           | Postmenopausal    | >35         | Metastatic carcinosarcoma          | 4          |
| OC24           | 75           | Postmenopausal    | >35         | Serous adenocarcinoma              | 1A         |
| OC25           | 60           | Postmenopausal    | >35         | Clear cell carcinoma               | 3C         |
| OC26           | 53           | Postmenopausal    | >35         | Serous adenocarcinoma              | 3C         |
| OC27           | 36           | Premenopausal     | >35         | Serous adenocarcinoma              | 1A         |
| OC29           | 56           | Postmenopausal    | >35         | Serous adenocarcinoma              | 3A         |
| OC30           | 70           | Postmenopausal    | <35         | Mucinous carcinoma                 | 2A         |
| OC32           | 65           | Postmenopausal    | >35         | Mucinous carcinoma                 | 1A         |
| OC33           | 59           | Postmenopausal    | <35         | Metastatic carcinosarcoma          | 3C         |
| OC34           | 85           | Postmenopausal    | >35         | Serous adenocarcinoma              | 3B         |
| OC35           | 63           | Postmenopausal    | >35         | Mucinous carcinoma                 | 1C         |
| OC36           | 73           | Postmenopausal    | >35         | Serous adenocarcinoma              | 1C         |
| <b>Average</b> | <b>65.23</b> |                   |             |                                    |            |

Table S3 - Patients characteristics in the endometrial cancer group.

| GUTB code      | Age (years) | Menopausal status | Histology: grade (G1,G2,G3) and subtype | Endometrial thickness |
|----------------|-------------|-------------------|-----------------------------------------|-----------------------|
| EC1            | 77          | Postmenopausal    | G1, Endometrioid type                   | > 5 mm                |
| EC2            | 87          | Postmenopausal    | G3, Endometrioid type                   | > 5 mm                |
| EC3            | 64          | Postmenopausal    | G1, Endometrioid type                   | > 5 mm                |
| EC4            | 78          | Postmenopausal    | G3, Carcinosarcoma                      | > 5 mm                |
| EC6            | 66          | Postmenopausal    | G3, Endometrioid/Serous type            | > 5 mm                |
| EC7            | 73          | Postmenopausal    | G3, Carcinosarcoma                      | > 5 mm                |
| EC12           | 72          | Postmenopausal    | G3, Clear Cell carcinoma                | > 5 mm                |
| EC14           | 78          | Postmenopausal    | G1, Endometrioid type                   | > 5 mm                |
| EC18           | 71          | Postmenopausal    | G3, Clear Cell carcinoma                | > 5 mm                |
| EC20           | 82          | Postmenopausal    | G3, Uterine Serous cancer               | > 5 mm                |
| EC21           | 72          | Postmenopausal    | G3, Clear Cell carcinoma                | > 5 mm                |
| EC22           | 68          | Postmenopausal    | G2, Endometrioid type                   | > 5 mm                |
| EC23           | 82          | Postmenopausal    | G3, Carcinosarcoma                      | > 5 mm                |
| EC26           | 68          | Postmenopausal    | G3, Carcinosarcoma                      | > 5 mm                |
| EC27           | 57          | Postmenopausal    | G3, Endometrioid type                   | > 5 mm                |
| EC28           | 64          | Postmenopausal    | G3, Mixed endometrioid/clear cell type  | > 5 mm                |
| EC29           | 66          | Postmenopausal    | G1, Endometrioid type                   | > 5 mm                |
| EC30           | 57          | Postmenopausal    | G1, Endometrioid type                   | > 5 mm                |
| EC32           | 60          | Postmenopausal    | G1, Endometrioid type                   | > 5 mm                |
| EC33           | 63          | Postmenopausal    | G3, Carcinosarcoma                      | > 5 mm                |
| EC34           | 62          | Postmenopausal    | G3, Clear Cell carcinoma                | > 5 mm                |
| EC35           | 56          | Postmenopausal    | G1, Endometrioid type                   | > 5 mm                |
| EC37           | 76          | Postmenopausal    | G3, Uterine serous cancer               | > 5 mm                |
| EC38           | 57          | Postmenopausal    | G1, Endometrioid type                   | > 5 mm                |
| EC41           | 73          | Postmenopausal    | G1, Endometrioid type                   | > 5 mm                |
| EC43           | 61          | Postmenopausal    | G3, Endometrioid type                   | > 5 mm                |
| EC44           | 48          | Premenopausal     | G1, Endometrioid type                   | > 5 mm                |
| EC45           | 59          | Postmenopausal    | G1, Endometrioid type                   | > 5 mm                |
| EC47           | 67          | Postmenopausal    | G1, Endometrioid type                   | > 5 mm                |
| EC48           | 82          | Postmenopausal    | G1, Endometrioid type                   | > 5 mm                |
| <b>Average</b> | <b>68.2</b> |                   |                                         |                       |

## Electronic Supplementary Information

**Table S4 - Spectral acquisition settings.**

These parameters are found in the “Advanced measurement” box in OPUS 6.5 software (Bruker Optik GmbH).

| Parameter name                     | Value                                              |
|------------------------------------|----------------------------------------------------|
| <i>Basic</i>                       |                                                    |
| Imaging device                     | Helios                                             |
| Objective                          | HELIOS ATR                                         |
| <i>Advanced</i>                    |                                                    |
| Resolution                         | 8 cm <sup>-1</sup>                                 |
| Sample scan time                   | 32 Scans                                           |
| Background scan time               | 32 Scans                                           |
| Save data from                     | 4000 cm <sup>-1</sup> to 400 cm <sup>-1</sup>      |
| Result spectrum                    | ATR Spectrum                                       |
| Data blocks to be saved            | - ATR Spectrum<br>- Single Channel<br>- Background |
| <i>Optic</i>                       |                                                    |
| External synchronization           | Off                                                |
| Source setting                     | MIR                                                |
| Beamsplitter                       | KBr                                                |
| Optical Filter setting             | Open                                               |
| Aperture setting                   | 6 mm                                               |
| Measurement channel                | Sample Compartment                                 |
| Background meas. Channel           | Sample Compartment                                 |
| Detector setting                   | RT-DLaTGS [Internal]                               |
| Scanner velocity                   | 2.2 KHz                                            |
| Sample signal gain                 | Automatic                                          |
| Background signal gain             | Automatic                                          |
| Delay after device change          | 0                                                  |
| Delay before measurement           | 0                                                  |
| Optical bench ready                | OFF                                                |
| <i>Acquisition</i>                 |                                                    |
| Wanted high frequency limit        | 8000                                               |
| Wanted low frequency limit         | 0                                                  |
| High Pass filter                   | Open                                               |
| Low Pass filter                    | 10 KHz                                             |
| Acquisition mode                   | Double Sided, Forward-Backward                     |
| Correlation mode                   | OFF                                                |
| <i>Fourier transformation (FT)</i> |                                                    |
| Phase resolution                   | 32                                                 |
| Phase Correction mode              | Mertz / No Peak Search                             |
| Apodization function               | Blackman-Harris 3-Term                             |
| Zerofilling factor                 | 2                                                  |

**Table S5 - Classification results: ovarian plasma data - all system set-ups.**

Each system set-up is a combination of a feature extraction method (left column) with a classification method (top row). The numbers shown represent classification rates (%)  $\pm$  standard deviations (%).

(This table is identical to Figure 4A in the main manuscript and repeated here for convenience).

|                           | eClass1           | k-NN              | LDC               | QDC               | SVM               |
|---------------------------|-------------------|-------------------|-------------------|-------------------|-------------------|
| PCA                       | 85 $\pm$ 12.3     | 80 $\pm$ 18.92    | 95 $\pm$ 8.05     | 85 $\pm$ 16.57    | 86.67 $\pm$ 10.54 |
| PLS                       | 86.67 $\pm$ 10.54 | 71.67 $\pm$ 8.05  | 91.67 $\pm$ 8.78  | 86.67 $\pm$ 10.54 | 81.67 $\pm$ 16.57 |
| Spline                    | 91.67 $\pm$ 11.79 | 76.67 $\pm$ 16.1  | 86.67 $\pm$ 15.32 | 90 $\pm$ 8.61     | 83.33 $\pm$ 11.11 |
| FS-LASSO                  | 96.67 $\pm$ 7.03  | 75 $\pm$ 21.15    | 93.33 $\pm$ 8.61  | 90 $\pm$ 11.65    | 93.33 $\pm$ 8.61  |
| FS-Fisher                 | 76.67 $\pm$ 14.05 | 81.67 $\pm$ 12.3  | 75 $\pm$ 14.16    | 75 $\pm$ 11.79    | 76.67 $\pm$ 14.05 |
| FFS ( <i>classifier</i> ) | 91.67 $\pm$ 11.79 | 88.33 $\pm$ 13.72 | 93.33 $\pm$ 8.61  | 93.33 $\pm$ 8.61  | 85 $\pm$ 14.59    |
| FFS (MANOVA)              | 88.33 $\pm$ 8.05  | 86.67 $\pm$ 17.21 | 91.67 $\pm$ 8.78  | 90 $\pm$ 14.05    | 85 $\pm$ 12.3     |
| Identity                  | 93.33 $\pm$ 8.61  | 76.67 $\pm$ 17.92 | 91.67 $\pm$ 8.78  | 19.69 $\pm$ 20.5  | 81.67 $\pm$ 9.46  |

**Table S6 - Classification results: ovarian plasma data - 10 best system set-ups from Table S5.**

These setups are listed here to show, apart from the classification rates, the computational time, and the  $P$ -values. The latter represent the probability of the observed classification rates of adjacent rankings, given that they are equal. The null hypothesis may be formulated as  $H_0 : r_i - r_{i+1} = 0$ , where  $r_i$  and  $r_{i+1}$  are respectively the classification rates for ranking  $i$  and  $i+1$ . The  $P$ -values were calculated using a  $T$ -test. For example, the  $P$ -value of 0.296 results from the hypothesis test involving the setups Identity $\rightarrow$ eClass1 and FFS (MANOVA) $\rightarrow$ LDC.

| Ranking | System set-up                  | Classification rate (%) | Training+test time (seconds) | $P$ -values |
|---------|--------------------------------|-------------------------|------------------------------|-------------|
| » 1     | FS-LASSO $\rightarrow$ eClass1 | 96.67 $\pm$ 7.03        | 1.27 $\pm$ 0.11              | 0.172       |
| 2       | PCA $\rightarrow$ LDC          | 95.00 $\pm$ 8.05        | 0.15 $\pm$ 0.01              | 0.172       |
| 3       | FFS $\rightarrow$ QDC          | 93.33 $\pm$ 8.61        | 0.07 $\pm$ 0.01              | 0.500       |
| 4       | FS-LASSO $\rightarrow$ LDC     | 93.33 $\pm$ 8.61        | 0.08 $\pm$ 0.01              | 0.500       |
| 5       | FFS $\rightarrow$ LDC          | 93.33 $\pm$ 8.61        | 0.08 $\pm$ 0.01              | 0.500       |
| 6       | FS-LASSO $\rightarrow$ SVM     | 93.33 $\pm$ 8.61        | 0.28 $\pm$ 0.04              | 0.500       |
| 7       | Identity $\rightarrow$ eClass1 | 93.33 $\pm$ 8.61        | 3.17 $\pm$ 0.37              | 0.296       |
| 8       | FFS (MANOVA) $\rightarrow$ LDC | 91.67 $\pm$ 8.78        | 0.08 $\pm$ 0.00              | 0.500       |
| 9       | Identity $\rightarrow$ LDC     | 91.67 $\pm$ 8.78        | 0.12 $\pm$ 0.01              | 0.500       |
| 10      | PLS $\rightarrow$ LDC          | 91.67 $\pm$ 8.78        | 0.23 $\pm$ 0.07              | 0.500       |

**Table S7 - Classification results: ovarian plasma data - ensemble systems.**

The *P*-values calculated as in Table S6.

| Ranking | Ensemble of ... | Classification rate (%) | Training+test time (seconds) | <i>P</i> -values |
|---------|-----------------|-------------------------|------------------------------|------------------|
| » 1     | 1 system        | 96.67 ± 7.03            | 2.18 ± 0.63                  | 0.172            |
| 2       | 2 systems       | 95.00 ± 8.05            | 2.64 ± 1.04                  | 0.500            |
| 3       | 3 systems       | 95.00 ± 8.05            | 11.50 ± 1.75                 | 0.500            |
| 4       | 6 systems       | 95.00 ± 8.05            | 12.57 ± 1.64                 | 0.500            |
| 5       | 7 systems       | 95.00 ± 8.05            | 12.41 ± 0.95                 | 0.500            |
| 6       | 8 systems       | 95.00 ± 8.05            | 15.65 ± 1.79                 | 0.500            |
| 7       | 9 systems       | 95.00 ± 8.05            | 15.55 ± 1.80                 | 0.500            |
| 8       | 10 systems      | 95.00 ± 8.05            | 17.16 ± 1.69                 | 0.500            |
| 9       | 11 systems      | 95.00 ± 8.05            | 17.41 ± 1.28                 | 0.500            |
| 10      | 12 systems      | 95.00 ± 8.05            | 20.42 ± 2.70                 | 0.500            |

**Table S8 - Classification results: ovarian serum data - all system set-ups.**

Each system set-up is a combination of a feature extraction method (left column) with a classification method (top row). The numbers shown represent classification rates (%)  $\pm$  standard deviations (%).

(This table is identical to Figure 4B in the main manuscript and repeated here for convenience).

|                           | eClass1           | <i>k</i> -NN      | LDC               | QDC               | SVM               |
|---------------------------|-------------------|-------------------|-------------------|-------------------|-------------------|
| PCA                       | 78.33 $\pm$ 13.72 | 78.33 $\pm$ 11.25 | 81.67 $\pm$ 14.59 | 75 $\pm$ 16.2     | 76.67 $\pm$ 14.05 |
| PLS                       | 78.33 $\pm$ 13.72 | 81.67 $\pm$ 12.3  | 83.33 $\pm$ 15.71 | 73.33 $\pm$ 17.92 | 75 $\pm$ 16.2     |
| Spline                    | 81.67 $\pm$ 16.57 | 88.33 $\pm$ 13.72 | 76.67 $\pm$ 21.08 | 73.33 $\pm$ 16.1  | 86.67 $\pm$ 13.15 |
| FS-LASSO                  | 88.33 $\pm$ 13.72 | 78.33 $\pm$ 13.72 | 90 $\pm$ 11.65    | 83.33 $\pm$ 13.61 | 85 $\pm$ 9.46     |
| FS-Fisher                 | 85 $\pm$ 16.57    | 88.33 $\pm$ 11.25 | 85 $\pm$ 16.57    | 86.67 $\pm$ 15.32 | 80 $\pm$ 20.49    |
| FFS ( <i>classifier</i> ) | 86.67 $\pm$ 10.54 | 95 $\pm$ 8.05     | 83.33 $\pm$ 11.11 | 85 $\pm$ 16.57    | 91.67 $\pm$ 11.79 |
| FFS (MANOVA)              | 86.67 $\pm$ 13.15 | 81.67 $\pm$ 21.44 | 88.33 $\pm$ 13.72 | 86.67 $\pm$ 13.15 | 83.33 $\pm$ 13.61 |
| Identity                  | 78.33 $\pm$ 15.81 | 83.33 $\pm$ 15.71 | 80 $\pm$ 17.21    | 7.77 $\pm$ 18.29  | 86.67 $\pm$ 13.15 |

**Table S9 - Classification results: ovarian serum data - 10 best system set-ups from Table S8.**

The *P*-values calculated as in Table S6.

| Ranking | System set-up                        | Classification rate (%) | Training+test time (seconds) | <i>P</i> -values |
|---------|--------------------------------------|-------------------------|------------------------------|------------------|
| » 1     | FFS $\rightarrow$ <i>k</i> -NN       | 95.00 $\pm$ 8.05        | 0.36 $\pm$ 0.12              | 0.172            |
| 2       | FFS $\rightarrow$ SVM                | 91.67 $\pm$ 11.79       | 0.71 $\pm$ 0.54              | 0.339            |
| 3       | FS-LASSO $\rightarrow$ LDC           | 90.00 $\pm$ 11.65       | 0.32 $\pm$ 0.23              | 0.339            |
| 4       | FS-Fisher $\rightarrow$ <i>k</i> -NN | 88.33 $\pm$ 11.25       | 0.35 $\pm$ 0.11              | 0.500            |
| 5       | FFS (MANOVA) $\rightarrow$ LDC       | 88.33 $\pm$ 13.72       | 0.26 $\pm$ 0.19              | 0.500            |
| 6       | Spline $\rightarrow$ <i>k</i> -NN    | 88.33 $\pm$ 13.72       | 0.39 $\pm$ 0.11              | 0.500            |
| 7       | FS-LASSO $\rightarrow$ eClass1       | 88.33 $\pm$ 13.72       | 2.51 $\pm$ 0.91              | 0.379            |
| 8       | FFS $\rightarrow$ eClass1            | 86.67 $\pm$ 10.54       | 2.46 $\pm$ 1.22              | 0.500            |
| 9       | FFS (MANOVA) $\rightarrow$ QDC       | 86.67 $\pm$ 13.15       | 0.12 $\pm$ 0.08              | 0.500            |
| 10      | Spline $\rightarrow$ SVM             | 86.67 $\pm$ 13.15       | 1.11 $\pm$ 0.47              | 0.500            |

**Table S10 - Classification results: ovarian serum data - ensemble systems.**

The *P*-values calculated as in Table S6.

| Ranking | Ensemble of ... | Classification rate (%) | Training+test time (seconds) | <i>P</i> -values |
|---------|-----------------|-------------------------|------------------------------|------------------|
| » 1     | 1 system        | 95.00 ± 8.05            | 0.25 ± 0.14                  | 0.500            |
| 2       | 2 systems       | 95.00 ± 8.05            | 0.88 ± 0.57                  | 0.500            |
| 3       | 5 systems       | 95.00 ± 8.05            | 3.95 ± 1.15                  | 0.500            |
| 4       | 6 systems       | 95.00 ± 8.05            | 4.58 ± 1.52                  | 0.500            |
| 5       | 7 systems       | 95.00 ± 8.05            | 4.32 ± 1.60                  | 0.500            |
| 6       | 8 systems       | 95.00 ± 8.05            | 7.94 ± 0.96                  | 0.500            |
| 7       | 17 systems      | 95.00 ± 8.05            | 14.46 ± 2.64                 | 0.500            |
| 8       | 3 systems       | 95.00 ± 11.25           | 1.10 ± 0.61                  | 0.500            |
| 9       | 4 systems       | 95.00 ± 11.25           | 1.62 ± 1.04                  | 0.339            |
| 10      | 18 systems      | 93.33 ± 8.61            | 15.51 ± 2.44                 | 0.500            |



**Table S11 - Classification results: endometrial plasma data - all system set-ups.**

Each system set-up is a combination of a feature extraction method (left column) with a classification method (top row). The numbers shown represent classification rates (%)  $\pm$  standard deviations (%).

(This table is identical to Figure 4C in the main manuscript and repeated here for convenience).

|              | eClass1           | <i>k</i> -NN      | LDC               | QDC               | SVM               |
|--------------|-------------------|-------------------|-------------------|-------------------|-------------------|
| PCA          | 63.18 $\pm$ 13.71 | 60.57 $\pm$ 12.32 | 63.01 $\pm$ 13.96 | 69.74 $\pm$ 16.99 | 68.69 $\pm$ 10.52 |
| PLS          | 62.13 $\pm$ 11.62 | 55.71 $\pm$ 17.91 | 63.84 $\pm$ 13.38 | 65.34 $\pm$ 13.63 | 67.77 $\pm$ 16.63 |
| Spline       | 63.83 $\pm$ 12.17 | 57.7 $\pm$ 12.59  | 61.94 $\pm$ 11.92 | 68.59 $\pm$ 18.3  | 71.78 $\pm$ 13.32 |
| FS-LASSO     | 68.83 $\pm$ 15.73 | 62.01 $\pm$ 16.53 | 63.98 $\pm$ 13.9  | 71.43 $\pm$ 15.7  | 68.33 $\pm$ 14.92 |
| FS-Fisher    | 73.26 $\pm$ 19.27 | 71.69 $\pm$ 15.47 | 72.9 $\pm$ 18.76  | 72.57 $\pm$ 20.53 | 69.34 $\pm$ 20.43 |
| FFS          | 70.98 $\pm$ 16.31 | 58.14 $\pm$ 21.65 | 66.59 $\pm$ 13.49 | 69.48 $\pm$ 17.33 | 67.41 $\pm$ 16.62 |
| FFS (MANOVA) | 66.61 $\pm$ 13.54 | 65.93 $\pm$ 16.54 | 67.03 $\pm$ 12.93 | 66.56 $\pm$ 15.98 | 66.19 $\pm$ 17.37 |
| Identity     | 62.3 $\pm$ 13.76  | 63.84 $\pm$ 15.92 | 62.95 $\pm$ 16.34 | 24.26 $\pm$ 27.93 | 74.85 $\pm$ 16.01 |

**Table S12 - Classification results: endometrial plasma data - 10 best set-ups from Table S11.**

The *P*-values calculated as in Table S6.

| Ranking | System set-up           | Classification rate (%) | Training+test time (seconds) | <i>P</i> -values |
|---------|-------------------------|-------------------------|------------------------------|------------------|
| » 1     | Identity→SVM            | 80.00 $\pm$ 18.92       | 1.50 $\pm$ 0.37              | 0.453            |
| 2       | FS-Fisher→ <i>k</i> -NN | 79.17 $\pm$ 18.84       | 0.39 $\pm$ 0.08              | 0.249            |
| 3       | Spline→QDC              | 73.75 $\pm$ 18.22       | 0.49 $\pm$ 0.26              | 0.500            |
| 4       | FS-Fisher→QDC           | 73.75 $\pm$ 19.45       | 0.25 $\pm$ 0.07              | 0.500            |
| 5       | FS-LASSO→QDC            | 73.75 $\pm$ 19.45       | 0.31 $\pm$ 0.18              | 0.475            |
| 6       | Spline→SVM              | 73.33 $\pm$ 16.10       | 1.14 $\pm$ 0.72              | 0.500            |
| 7       | FS-Fisher→LDC           | 73.33 $\pm$ 22.50       | 0.16 $\pm$ 0.06              | 0.500            |
| 8       | FS-Fisher→eClass1       | 73.33 $\pm$ 22.50       | 2.54 $\pm$ 0.73              | 0.399            |
| 9       | FFS→eClass1             | 71.67 $\pm$ 17.66       | 3.58 $\pm$ 1.56              | 0.457            |
| 10      | FFS→QDC                 | 70.83 $\pm$ 18.43       | 0.19 $\pm$ 0.07              | 0.500            |

**Table S13 - Classification results: endometrial plasma data - ensemble systems.**

The *P*-values calculated as in Table S6.

| #   | Ensemble of ... | Classification rate (%) | Training+test time (seconds) | <i>P</i> -values |
|-----|-----------------|-------------------------|------------------------------|------------------|
| » 1 | 3 systems       | 81.67 ± 18.34           | 2.25 ± 0.81                  | 0.379            |
| 2   | 1 system        | 80.00 ± 18.92           | 1.71 ± 0.57                  | 0.339            |
| 3   | 4 systems       | 78.33 ± 19.33           | 2.54 ± 0.87                  | 0.500            |
| 4   | 5 systems       | 78.33 ± 19.33           | 2.55 ± 0.87                  | 0.296            |
| 5   | 2 systems       | 76.67 ± 17.92           | 1.99 ± 0.78                  | 0.500            |
| 6   | 7 systems       | 76.67 ± 21.08           | 5.74 ± 1.81                  | 0.500            |
| 7   | 8 systems       | 76.67 ± 21.08           | 5.86 ± 1.70                  | 0.296            |
| 8   | 11 systems      | 75.00 ± 19.64           | 8.93 ± 2.57                  | 0.500            |
| 9   | 6 systems       | 75.00 ± 21.15           | 3.95 ± 1.08                  | 0.500            |
| 10  | 9 systems       | 75.00 ± 19.64           | 8.39 ± 1.57                  | 0.500            |

**Table S14 - Classification results: endometrial serum data - all system set-ups.**

Each system set-up is a combination of a feature extraction method (left column) with a classification method (top row). The numbers shown represent classification rates (%)  $\pm$  standard deviations (%).

(This table is identical to Figure 4D in the main manuscript and repeated here for convenience).

|              | eClass1           | k-NN              | LDC               | QDC               | SVM               |
|--------------|-------------------|-------------------|-------------------|-------------------|-------------------|
| PCA          | 60.86 $\pm$ 12.39 | 57.79 $\pm$ 9.32  | 59.61 $\pm$ 13.95 | 56.88 $\pm$ 13.67 | 58.02 $\pm$ 24.52 |
| PLS          | 62.36 $\pm$ 16.52 | 58.64 $\pm$ 14.62 | 60.19 $\pm$ 12.07 | 61.46 $\pm$ 20.15 | 67.75 $\pm$ 20.51 |
| Spline       | 64.4 $\pm$ 14.91  | 51.9 $\pm$ 16.96  | 66.51 $\pm$ 13.41 | 63.49 $\pm$ 17.62 | 70.47 $\pm$ 16.96 |
| FS-LASSO     | 64.09 $\pm$ 19.2  | 56.39 $\pm$ 19.51 | 61.26 $\pm$ 12.61 | 58.88 $\pm$ 22.06 | 74.05 $\pm$ 17.84 |
| FS-Fisher    | 67.32 $\pm$ 14.34 | 60.66 $\pm$ 17.17 | 67.2 $\pm$ 14.43  | 66.68 $\pm$ 11.75 | 72.9 $\pm$ 16.07  |
| FFS          | 68.1 $\pm$ 15.24  | 64.63 $\pm$ 18.41 | 64.3 $\pm$ 21.44  | 63.74 $\pm$ 13.14 | 53.78 $\pm$ 10.6  |
| FFS (MANOVA) | 62.36 $\pm$ 16.48 | 63.87 $\pm$ 14.95 | 63.67 $\pm$ 16.92 | 63.74 $\pm$ 13.29 | 71.09 $\pm$ 17.34 |
| Identity     | 59.24 $\pm$ 13.32 | 58.26 $\pm$ 14.56 | 61.2 $\pm$ 13.6   | 21.33 $\pm$ 31.86 | 71.09 $\pm$ 22.3  |

**Table S15 - Classification results: endometrial serum data - 10 best set-ups from Table S14.**

The *P*-values calculated as in Table S6.

| Ranking | System set-up    | Classification rate (%) | Training+test time (seconds) | <i>P</i> -values |
|---------|------------------|-------------------------|------------------------------|------------------|
| » 1     | FS-Fisher→SVM    | 76.67 $\pm$ 14.05       | 1.14 $\pm$ 0.63              | 0.373            |
| 2       | FS-LASSO→SVM     | 75.42 $\pm$ 21.01       | 2.03 $\pm$ 1.89              | 0.461            |
| 3       | FFS (MANOVA)→SVM | 75.00 $\pm$ 21.15       | 1.52 $\pm$ 0.94              | 0.276            |
| 4       | Identity→SVM     | 72.08 $\pm$ 22.23       | 4.85 $\pm$ 2.58              | 0.390            |
| 5       | FS-Fisher→QDC    | 70.42 $\pm$ 10.48       | 0.14 $\pm$ 0.05              | 0.500            |
| 6       | Spline→SVM       | 70.42 $\pm$ 17.17       | 1.68 $\pm$ 0.71              | 0.500            |
| 7       | FFS→eClass1      | 70.42 $\pm$ 21.56       | 2.41 $\pm$ 0.67              | 0.379            |
| 8       | Spline→eClass1   | 68.33 $\pm$ 14.59       | 3.11 $\pm$ 1.16              | 0.500            |
| 9       | Spline→LDC       | 68.33 $\pm$ 16.57       | 0.13 $\pm$ 0.06              | 0.457            |
| 10      | FFS→k-NN         | 67.50 $\pm$ 24.98       | 0.33 $\pm$ 0.13              | 0.477            |

**Table S16 - Classification results: endometrial serum data - ensemble systems.**

The *P*-values were calculated as in Table S6.

|   | Ranking   | Ensemble of ...   | Classification rate (%) | Training+test time (seconds) | <i>P</i> -values |
|---|-----------|-------------------|-------------------------|------------------------------|------------------|
| » | <b>1</b>  | <b>2 systems</b>  | <b>77.08 ± 15.87</b>    | <b>1.85 ± 0.97</b>           | <b>0.427</b>     |
|   | <b>2</b>  | <b>1 system</b>   | 76.67 ± 14.05           | 0.65 ± 0.40                  | 0.500            |
|   | <b>3</b>  | <b>3 systems</b>  | 76.67 ± 17.92           | 2.83 ± 1.15                  | 0.500            |
|   | <b>4</b>  | <b>4 systems</b>  | 76.67 ± 17.92           | 5.34 ± 1.98                  | 0.172            |
|   | <b>5</b>  | <b>5 systems</b>  | 75.00 ± 19.64           | 5.29 ± 1.88                  | 0.154            |
|   | <b>6</b>  | <b>6 systems</b>  | 70.42 ± 15.27           | 6.44 ± 1.97                  | 0.500            |
|   | <b>7</b>  | <b>7 systems</b>  | 70.42 ± 17.17           | 7.28 ± 1.99                  | 0.500            |
|   | <b>8</b>  | <b>10 systems</b> | 70.42 ± 17.17           | 8.65 ± 1.92                  | 0.500            |
|   | <b>9</b>  | <b>11 systems</b> | 70.42 ± 17.17           | 9.95 ± 1.94                  | 0.500            |
|   | <b>10</b> | <b>12 systems</b> | 70.42 ± 15.27           | 10.11 ± 2.03                 | 0.500            |
